# Supplementary material for: Profiling of Bacterial and Fungal Microbial Communities in Cystic Fibrosis Sputum Using RNA
Source: PubMed Central journal article supplement (PMC6083091; doi:10.1128/msphere.00292-18), 2018-08-08

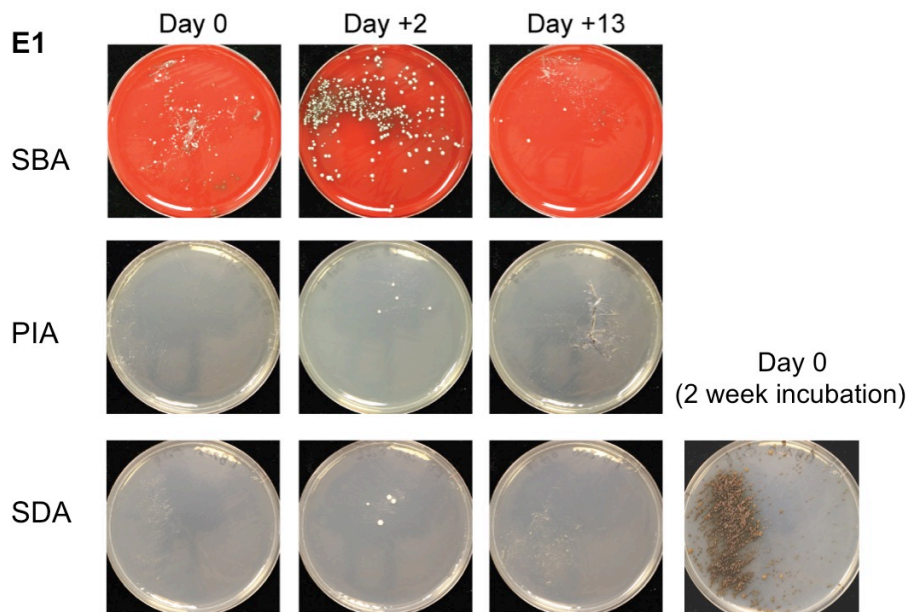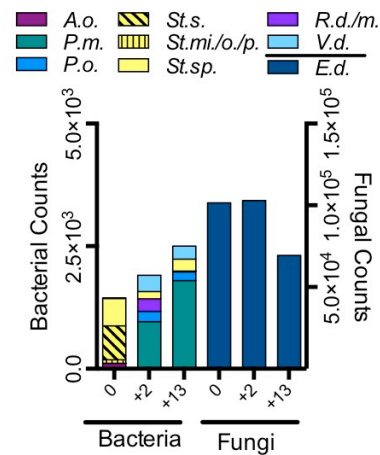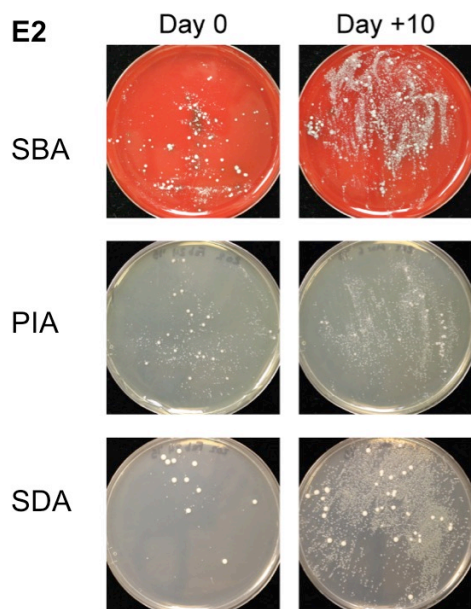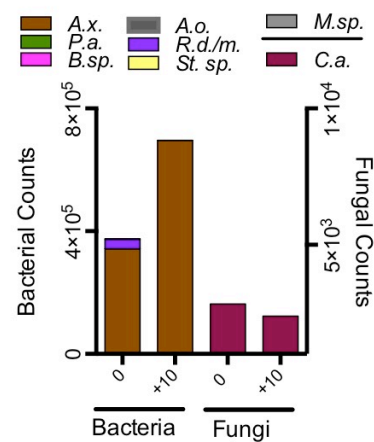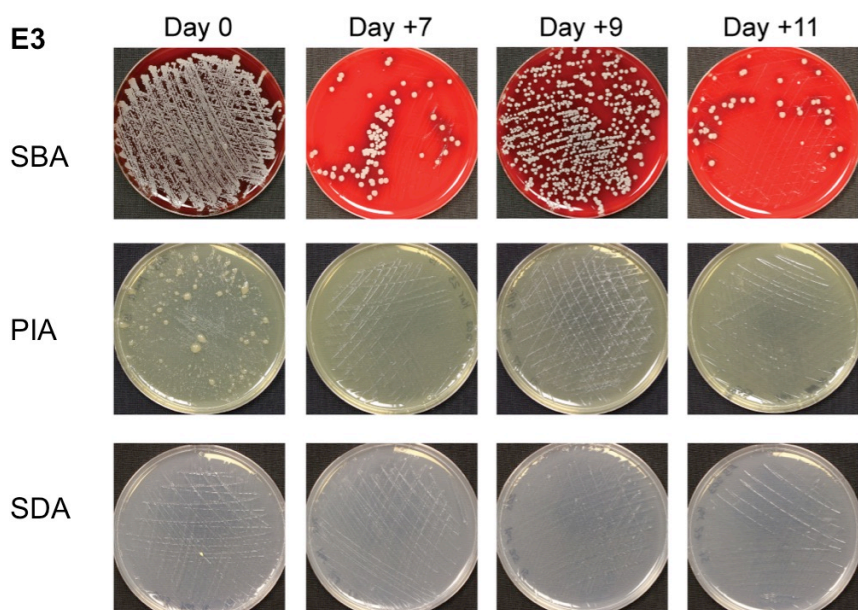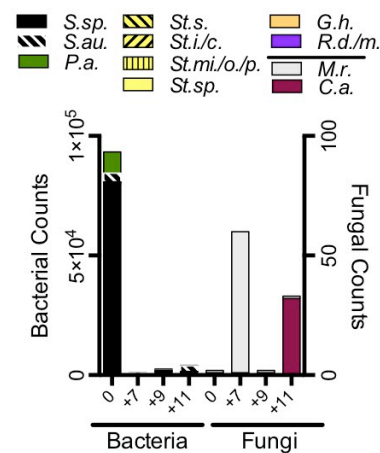

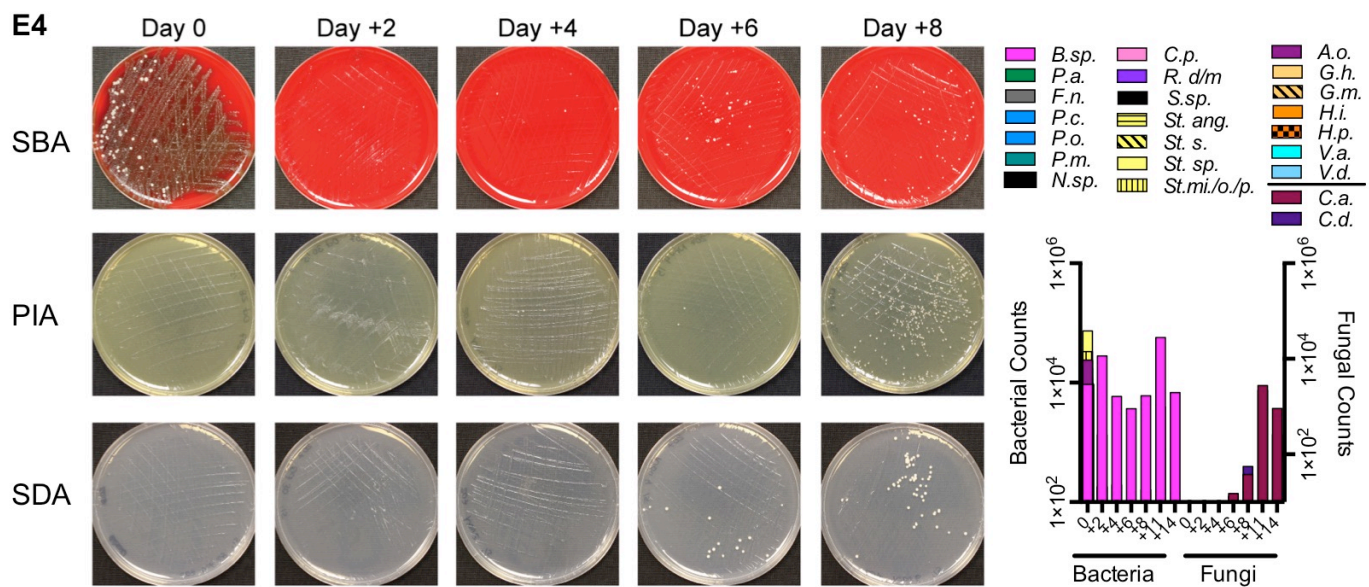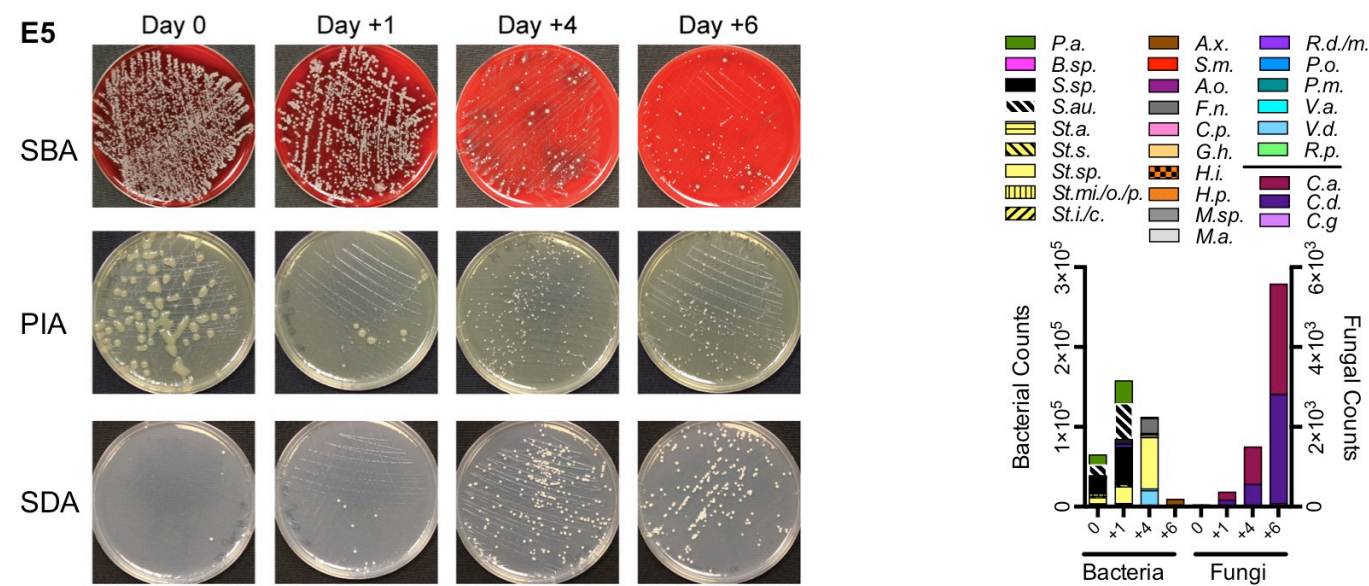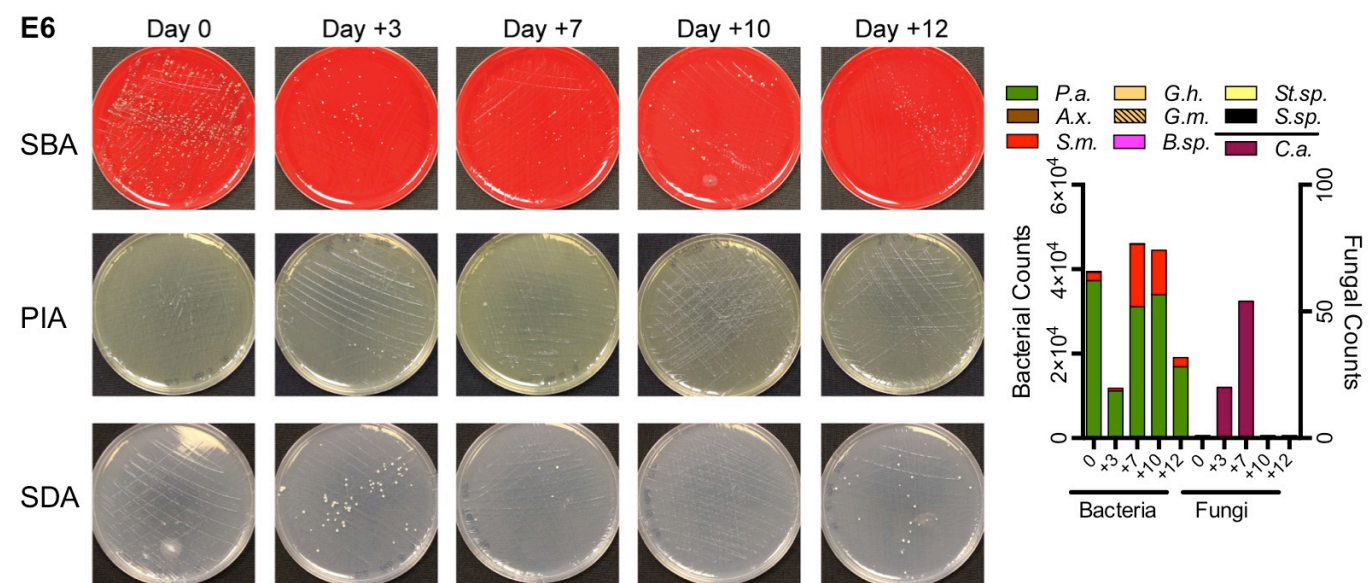

Supplement: sph004182610sf3.pdf [file sph004182610sf3.pdf]
